# Supplementary material for: Synthesis of Micron-Sized NiAl/NiCoAl-Layered Double Hydroxides via a Facile Double Hydrolysis Dropping Method for Supercapacitor Applications
Source: Frontiers journal article supplement (doi:10.3389/fenrg.2022.837160), 2022-04-26
Supplement: Data_Sheet_1.PDF [file Data_Sheet_1.PDF]

## Supporting Information

**Table S1** The comparison of the electrochemical performance of NiAl and NiCoAl LDHs synthesized by different methods

| Working electrode                                             | Method                                     | Specific Capacity (SC)                                                                           | SC retention after 1000 cycles | Ref              |
|---------------------------------------------------------------|--------------------------------------------|--------------------------------------------------------------------------------------------------|--------------------------------|------------------|
| <b>NA-2</b>                                                   | <b>Dropping double hydrolysis method</b>   | <b>583 C g<sup>-1</sup> at 1 A g<sup>-1</sup><br/>530 C g<sup>-1</sup> at 2 A g<sup>-1</sup></b> | <b>83.3%</b>                   | <b>This Work</b> |
| NiAl-LDH                                                      | Hydrothermal method                        | 471.2 C g <sup>-1</sup> at 1 A g <sup>-1</sup>                                                   | 88%                            | [1]              |
| NiAl-LDH@GOs <sup>a</sup>                                     | Hydrothermal method                        | 556 C g <sup>-1</sup> at 1 A g <sup>-1</sup>                                                     | 98%                            | [2]              |
| NiAl-LDH                                                      | Hydrothermal method                        | 390.6 C g <sup>-1</sup> at 2 A g <sup>-1</sup>                                                   | 90%                            | [3]              |
| NiAl-LDH core-shell spheres                                   | Solvothermal method                        | 511 C g <sup>-1</sup> at 1 A g <sup>-1</sup>                                                     | 85%                            | [4]              |
| Ag NW@NiAl-LDH                                                | Hydrothermal method                        | 574 C g <sup>-1</sup> at 1 A g <sup>-1</sup>                                                     | 95%                            | [5]              |
| <b>NCA-3</b>                                                  | <b>Dropping double hydrolysis method</b>   | <b>703 C g<sup>-1</sup> at 1 A g<sup>-1</sup></b>                                                | <b>73.5%</b>                   | <b>This Work</b> |
| NiCoAl-LDH                                                    | Hydrothermal method                        | 534 C g <sup>-1</sup> at 1 A g <sup>-1</sup>                                                     | 90%                            | [1]              |
| Ni <sub>0.70</sub> Co <sub>0.05</sub> Al <sub>0.25</sub> -LDH | Hydrothermal method                        | 583 C g <sup>-1</sup> at 1 A g <sup>-1</sup>                                                     | 80%                            | [6]              |
| NiCoAl-LDH nanosheets                                         | Solvothermal method                        | 614 C g <sup>-1</sup> at 1 A g <sup>-1</sup>                                                     | 95%                            | [7]              |
| NiCo <sub>2</sub> Al-LDH@N-GO <sup>b</sup>                    | Hydrothermal method                        | 682 C g <sup>-1</sup> at 1 A g <sup>-1</sup>                                                     | 92%                            | [8]              |
| NiCoAl-LDH@NRG <sup>c</sup>                                   | Surfactantassisted co-precipitation method | 751 C g <sup>-1</sup> at 1 A g <sup>-1</sup>                                                     | 90%                            | [9]              |
| CoNiAl-LDH                                                    | Hydrothermal method                        | 624 C g <sup>-1</sup> at 1 A g <sup>-1</sup>                                                     | 92%                            | [10]             |

<sup>a</sup>GOs = Graphene oxides

<sup>b</sup>N-GO = N-doped reduced graphene oxide

<sup>c</sup>NRG = N-doped reduced graphene oxide

- [1] Tian, Y., Zhu, L., Han, E., Shang, M., Song, M. (2019). Effect of templating agent on Ni, Co, Al-based layered double hydroxides for high-performance asymmetric supercapacitors. *Ionics* 26, 367–381.
- [2] Golmohammadi, F., Amiri, M. (2020). Biomass-derived graphene-based nanocomposite: A facile template for decoration of ultrathin nickelaluminum layered double hydroxide nanosheets as high-performance supercapacitor. *International Journal of Hydrogen Energy* 45, 15578-15588.
- [3] Luo, k., Zhang, j., Chu, w., Chen, H. (2020). Facile Fabrication of Nickel Aluminum Layered Double Hydroxide/Carbon Nanotube Electrodes Toward High-Performance Supercapacitors. *ACS Omega* 5, 24693–24699.
- [4] Wu, S., Hui, K., Hui, K., N., Kim, K., H. (2017). Electrostatic-Induced assembly of graphene-encapsulated carbon@Nickel–Aluminum layered double hydroxide core–shell spheres hybrid structure for high-energy and high-power-density asymmetric supercapacitor. *ACS Applied Materials & Interfaces* 9, 1395–1406.
- [5] Li, L., Hui, K., Hui, K., Zhang, T., Fu, J., Cho, Y. (2018). High-performance solid-state flexible supercapacitor based on reduced graphene oxide/hierarchical core-shell Ag nanowire@NiAl layered double hydroxide film electrode. *Chemical Engineering Journal* 348, 338–349.
- [6] Zheng, C., Yao, T., Xu, T., Wang, H., Huang, P., Yan, Y., et al. (2016). Growth of ultrathin NiCoAl layered double hydroxide on reduced graphene oxide and superb supercapacitive performance of the resulting composite. *Journal of Alloys and Compounds* 678, 93-101.
- [7] Meng, Z., Yan, W., Zou, M., Miao, H., Ma, F., Patil, A., et al. (2021). Tailoring NiCoAl layered double hydroxide nanosheets for assembly of high-performance asymmetric supercapacitors. *Journal of Colloid and Interface Science* 583, 722–733.
- [8] Wang, X., Li, X., Huang, C., Hao, C., Ge, C., Guo, Y. (2020). Fabrication of NiCoAl-layered double hydroxide/N-GO for high energy allsolid-state asymmetric supercapacitors. *Applied Surface Science* 527, 146891.
- [9] Dai, Z., Liu, F., Chen, Y., Liu, Y., Bao, J., Han. M. (2019). Integrating ultrathin and modified NiCoAl-layered double hydroxide nanosheets with N-doped reduced graphene oxide for high-performance all-solid-state supercapacitors. *Nanoscale* 11, 9896-9905.
- [10] Zhang, S., Liu, J., Huang, P., Wang, H., Cao, C., Song, W. (2017). Carbonaceous aerogel and CoNiAl-LDH@CA nanocomposites derived from biomass for high performance pseudo-supercapacitor. *Science Bulletin* 62, 841-845.
